# Supplementary material for: Physicochemical characterization of diacyltetrol-based lipids consisting of both diacylglycerol and phospholipid headgroups
Source: Royal Society of Chemistry journal article supplement (doi:10.1039/c4ra02495h), 2014-01-01
Supplement: c4ra02495h2.pdf [file c4ra02495h2.pdf]

## Supporting Information

### Physicochemical Characterization of Diacyltetrol-Based Lipids consisting of both Diacylglycerol and Phospholipid headgroups

Narsimha Mamidi<sup>a,†</sup>, Sukhamoy Gorai<sup>a,†</sup>, Bolledu Ravi<sup>b</sup> and Debasis Manna<sup>a,\*</sup>

<sup>a</sup>Department of Chemistry, Indian Institute of Technology Guwahati, Assam 781039, India

<sup>b</sup>Department of Chemical Engineering, Indian Institute of Technology Guwahati, Assam 781039, India

#### Table of Content

| Sl. No | Content                                                                                                                                                                                                        | Page  |
|--------|----------------------------------------------------------------------------------------------------------------------------------------------------------------------------------------------------------------|-------|
| (I)    | Characteristic Monolayer Forming Properties of the Hybrid Lipids at Air-Water Interface.                                                                                                                       | S2    |
| (II)   | Air-Water Interfacial Behavior of the Lipids.                                                                                                                                                                  | S2-S3 |
| (III)  | Representative TEM images of hybrid lipids in presence of cholesterol (hybrid lipids: Cholesterol (6:4)).                                                                                                      | S3    |
| (IV)   | Representative FE-SEM images of hybrid lipids in presence of cholesterol (hybrid lipids: Cholesterol (6:4))                                                                                                    | S4    |
| (V)    | Differential Scanning Calorimetry Study of Liposomes.                                                                                                                                                          | S4    |
| (VI)   | Zeta-potential of unsaturated hybrid lipids, DAT-PX <sub>18</sub> as a function of pH                                                                                                                          | S5    |
| (VII)  | Rhodamine 6G (R6G) release profile from pure DAT-PX <sub>16</sub> liposomes.                                                                                                                                   | S6    |
| (VIII) | Carboxyfluorescein (CF) release profile from cholesterol containing DAT-PX <sub>16</sub> liposomes and Rhodamine 6G (R6G) release profile from cholesterol containing DAT-PS <sub>16</sub> and DPPC liposomes. | S6    |
| (IX)   | Rhodamine 6G (R6G) release profile from cholesterol containing DAT-PA <sub>16</sub> and DAT-PG <sub>16</sub> liposomes in absence and presence of different Ca <sup>2+</sup> concentration.                    | S6    |
| (X)    | Kinetics of Membrane Binding of PKC $\theta$ -C1b Subdomain                                                                                                                                                    | S7    |
| (XI)   | Membrane Binding Parameters of PKC $\theta$ -C1b Subdomain Determined from Kinetics SPR Analysis                                                                                                               | S7    |

**Table S2:** Characteristic monolayer forming properties of the hybrid lipids at air-water interface.

| lipid                | Acyl chain length | $A_0(\text{\AA}^2)$ | $C_s^{-1} \text{max} (\text{mN}/\text{m})$ | $\pi_{\text{comp}} (\text{mN}/\text{m})$ |
|----------------------|-------------------|---------------------|--------------------------------------------|------------------------------------------|
| DAT-PA <sub>16</sub> | 16:16             | $66.2 \pm 2.7$      | $54.8 \pm 1.9$                             | $25.2 \pm 1.5$                           |
| DAT-PA <sub>18</sub> | 18:18             | $86.4 \pm 3.3$      | $91.9 \pm 4.4$                             | $33.1 \pm 1.8$                           |
| DAT-PS <sub>16</sub> | 16:16             | $70.1 \pm 1.4$      | $60.0 \pm 1.7$                             | $47.3 \pm 2.4$                           |
| DAT-PS <sub>18</sub> | 18:18             | $90.3 \pm 3.2$      | $84.6 \pm 3.4$                             | $35.1 \pm 2.5$                           |
| DAT-PG <sub>16</sub> | 16:16             | $88.6 \pm 6.1$      | $74.9 \pm 3.1$                             | $41.5 \pm 2.2$                           |
| DAT-PG <sub>18</sub> | 18:18             | $124.8 \pm 4.1$     | $66.8 \pm 3.5$                             | $28.9 \pm 2.4$                           |

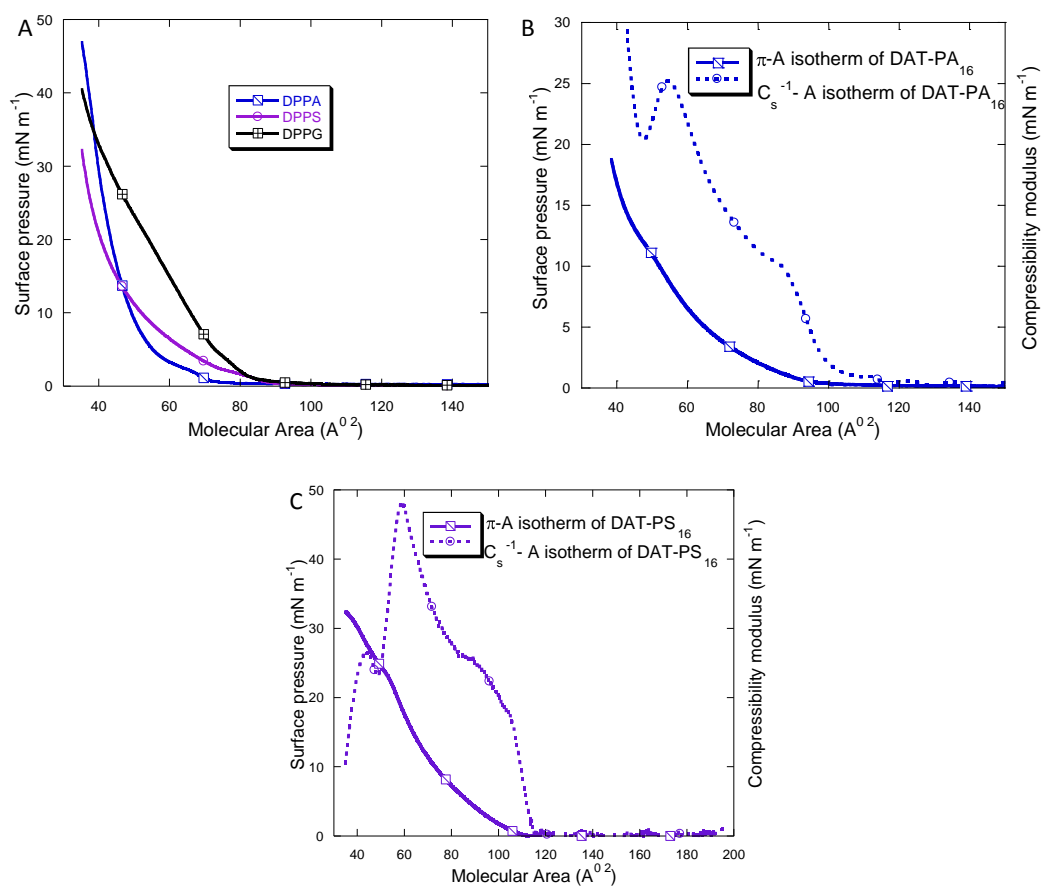

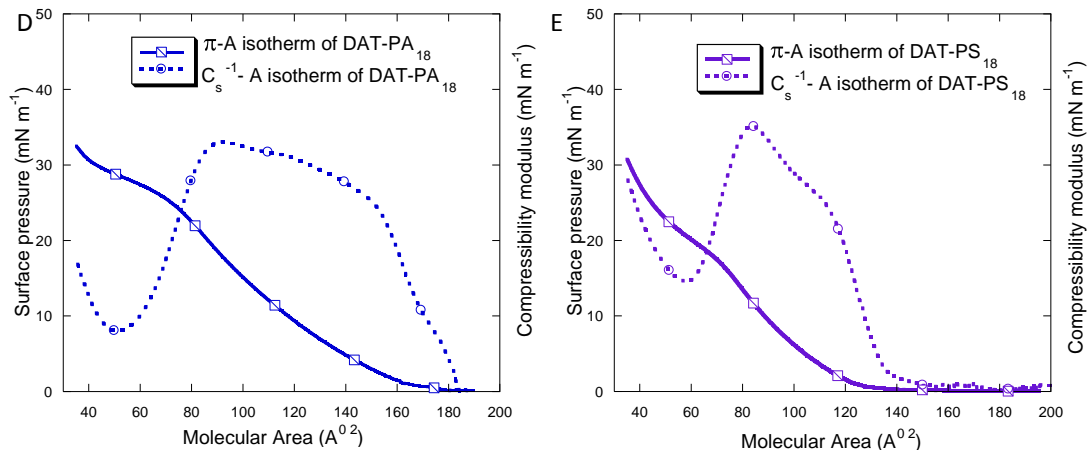

**Figure S36:** Air-water interfacial behavior of the lipids. (A) Surface pressure-molecular area ( $\pi$ -A) isotherm of DPPA (—), DPPS (—), and DPPG (—) lipids. (B)  $\pi$ -A (—) and compressibility modulus ( $C_s^{-1}$ )-A (—) isotherms of DAT-PA<sub>16</sub>. (C)  $\pi$ -A (—) and  $C_s^{-1}$ -A (—) isotherms of DAT-PS<sub>16</sub>. (D)  $\pi$ -A (—) and  $C_s^{-1}$ -A (—) isotherms of DAT-PA<sub>18</sub>. (E)  $\pi$ -A (—) and  $C_s^{-1}$ -A (—) isotherms of DAT-PS<sub>18</sub>. (E)

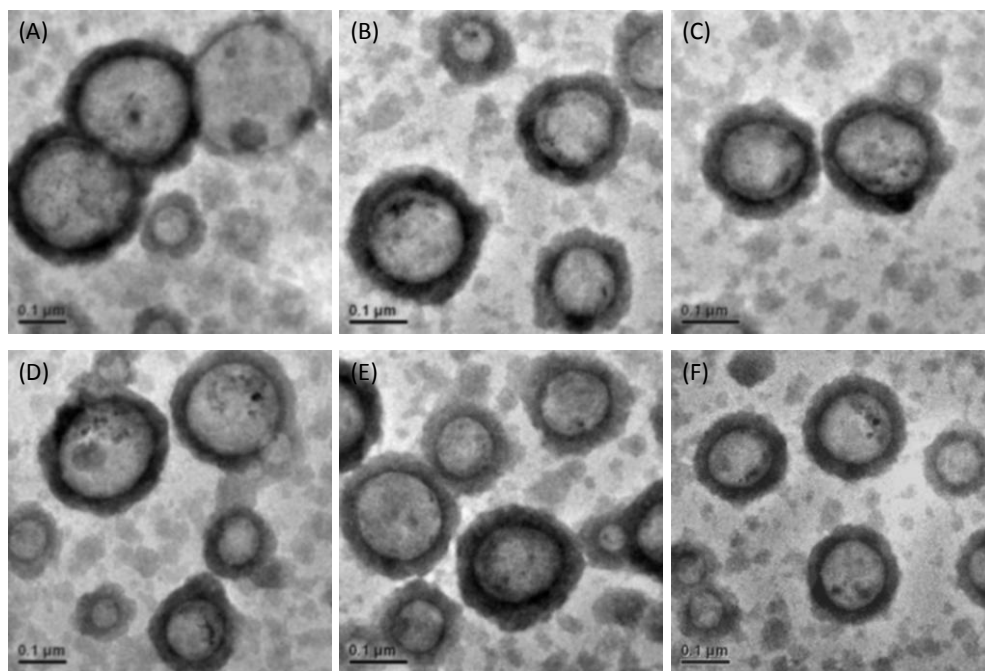

**Figure S37:** Representative TEM images of hybrid lipids in presence of cholesterol (hybrid lipids: Cholesterol (6:4)). TEM samples were prepared by negative staining with 1% uranyl acetate: (A) DAT-PA<sub>16</sub>/Cholesterol liposomes, (B) DAT-PS<sub>16</sub>/Cholesterol liposomes, (C) DAT-PG<sub>16</sub>/Cholesterol liposomes, (D) DAT-PA<sub>18</sub>/Cholesterol liposomes, (E) DAT-PS<sub>18</sub>/Cholesterol liposomes, and (F) DAT-PG<sub>18</sub>/Cholesterol liposomes.

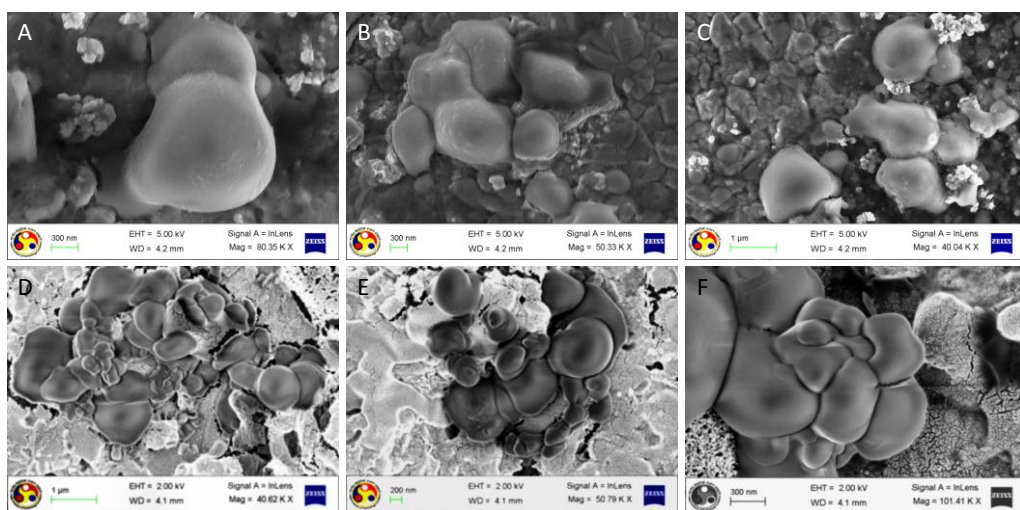

**Figure S38:** Representative FE-SEM images of hybrid lipids in presence of cholesterol (hybrid lipids: Cholesterol (6:4)): (A) DAT-PA<sub>16</sub>/Cholesterol liposomes, (B) DAT-PS<sub>16</sub>/Cholesterol liposomes, (C) DAT-PG<sub>16</sub>/Cholesterol liposomes, (D) DAT-PA<sub>18</sub>/Cholesterol liposomes, (E) DAT-PS<sub>18</sub>/Cholesterol liposomes, and (F) DAT-PG<sub>18</sub>/Cholesterol liposomes.

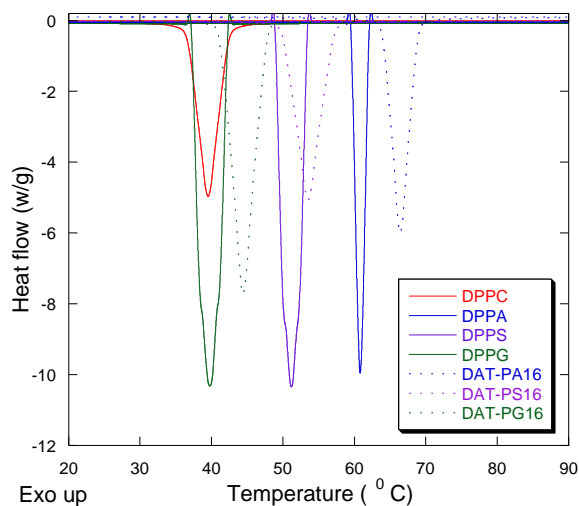

**Figure S39:** Differential scanning calorimetry study of liposomes.

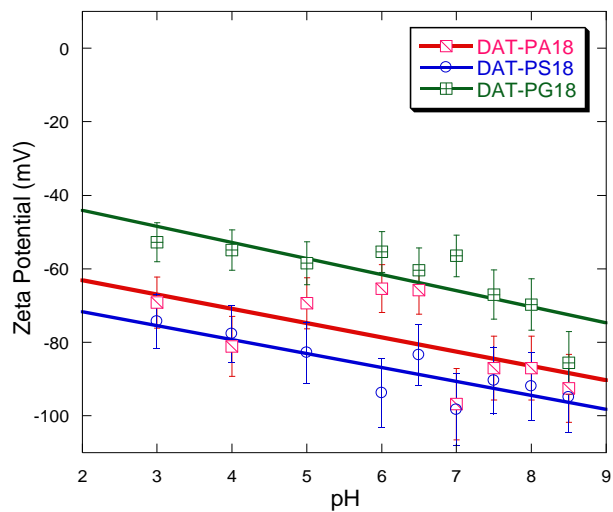

**Figure S40:** Zeta-potential of unsaturated hybrid lipids, DAT-PX<sub>18</sub> as a function of pH.

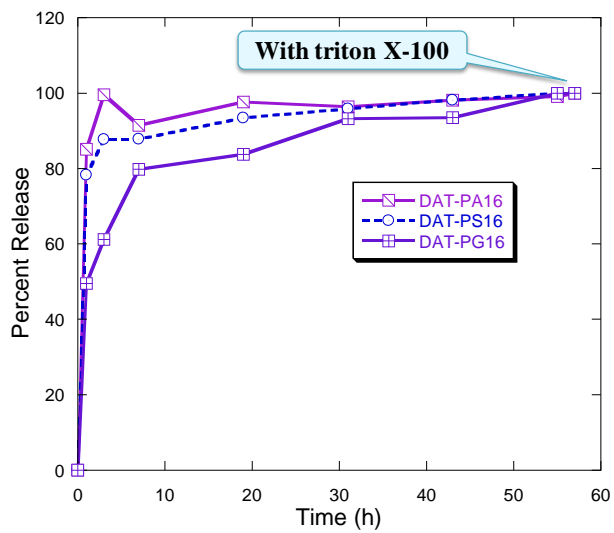

**Figure S41:** Rhodamine 6G (R6G) release profile from pure DAT-PX<sub>16</sub> liposomes.

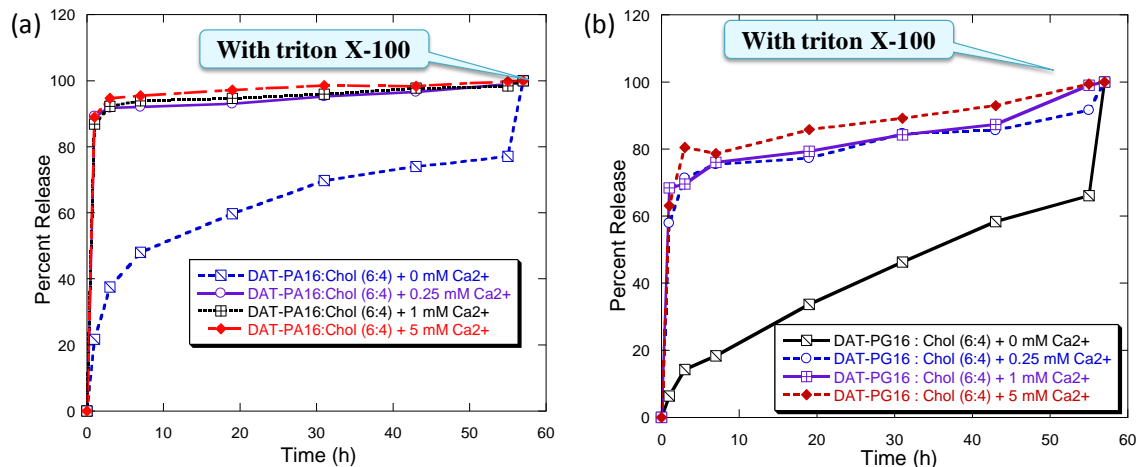

**Figure S42:** Rhodamine 6G (R6G) release profile from cholesterol containing DAT-PA<sub>16</sub> and DAT-PG<sub>16</sub> liposomes in absence and presence of different Ca<sup>2+</sup> concentration.

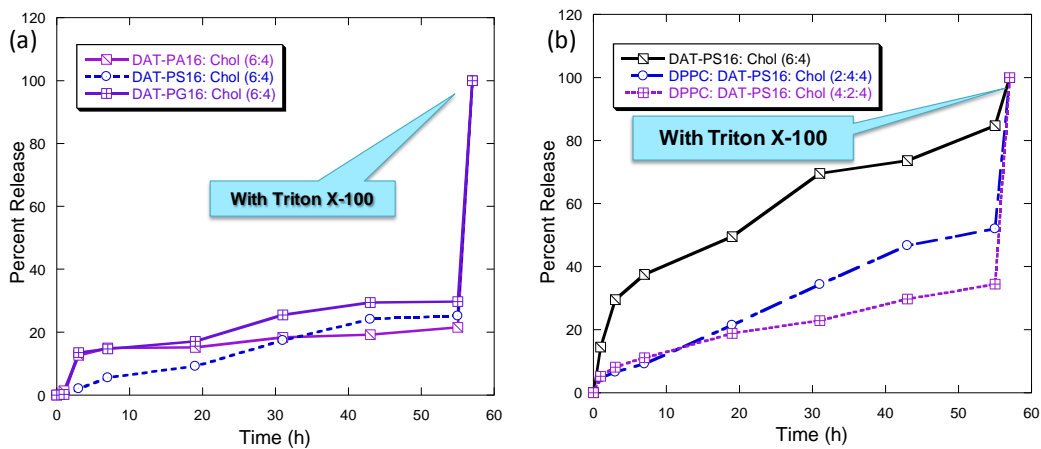

**Figure S43:** (a) Carboxyfluorescein (CF) release profile from cholesterol containing DAT-PX<sub>16</sub> liposomes. (b) Rhodamine 6G (R6G) release profile from cholesterol containing DAT-PS<sub>16</sub> and DPPC liposomes.

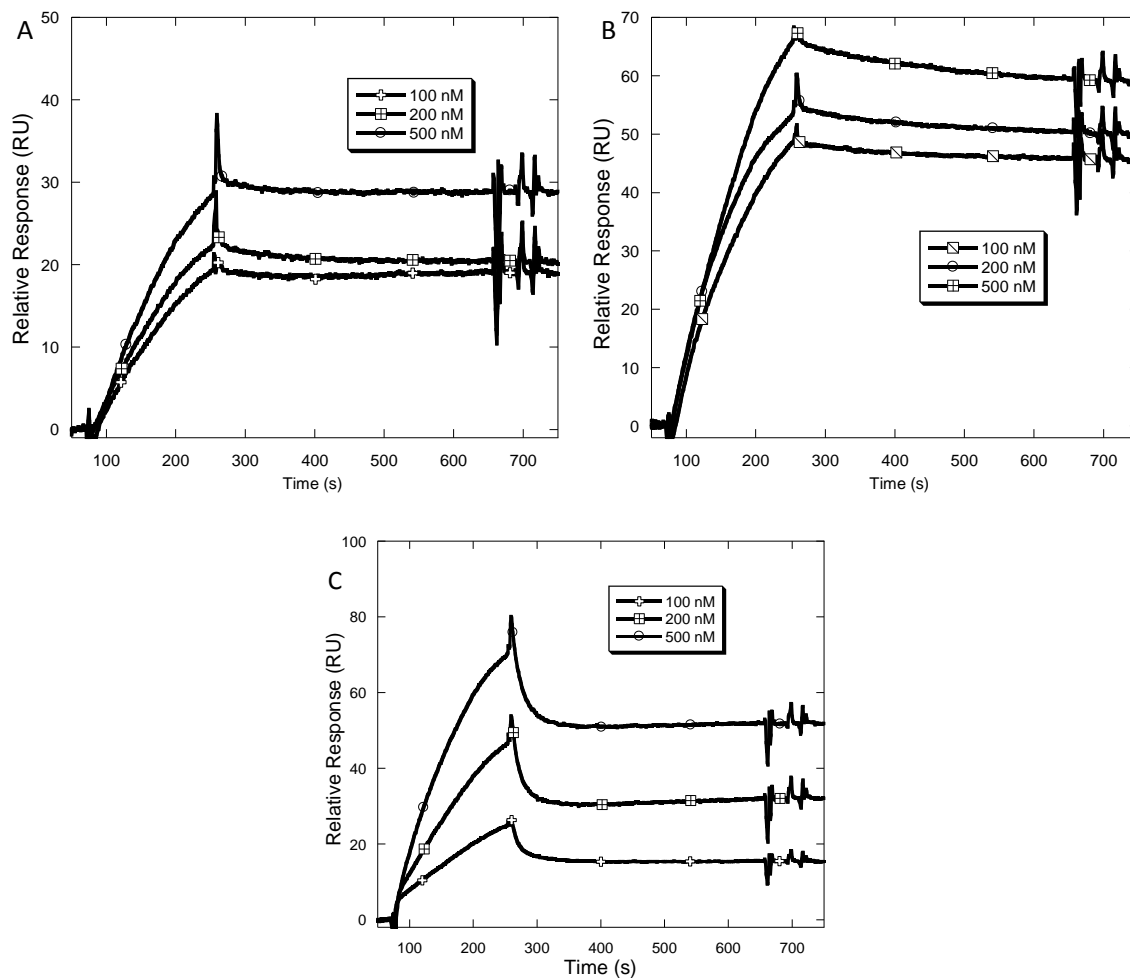

**Figure S44: Kinetics of membrane binding of PKC $\theta$ -C1b subdomain.** Kinetics of binding of PKC $\theta$ -C1b subdomain to the sensor chip coated with (A) PC/PE/DAT-PA<sub>16</sub> (75/20/5), (B) PC/PE/DAT-PS<sub>16</sub> (75/20/5) and (C) PC/PE/DAT-PG<sub>16</sub> (75/20/5) vesicles. All sensorgrams were taken with the same concentration (100, 200, 500 nM) of PKC $\theta$ -C1b subdomain. Flow rate was kept at 30  $\mu$ L/min. All the measurements were performed in 20 mM Tris, pH 7.4 containing 160 mM NaCl and 50  $\mu$ M ZnSO<sub>4</sub>.

**Table S3.** Membrane binding parameters of PKC $\theta$ -C1b subdomain determined from kinetics SPR analysis.

Values represent the mean  $\pm$  S.D. from triplicate measurements. All the measurements were performed in 20 mM Tris, pH 7.4 containing 160 mM NaCl and 50  $\mu$ M ZnSO<sub>4</sub>.

| Protein           | PC/PE/DAT-PA <sub>16</sub><br>(75:20:5) | PC/PE/DAT-PS <sub>16</sub><br>(75:20:5) | PC/PE/DAT-PG <sub>16</sub><br>(75:20:5) |
|-------------------|-----------------------------------------|-----------------------------------------|-----------------------------------------|
| PKC $\theta$ -C1b | 6.4 $\pm$ 1.2 nM                        | 13.6 $\pm$ 1.4 nM                       | 19.1 $\pm$ 1.1 nM                       |
